# Supplementary material
Source: publisher figshare collection journal article supplement (https://rs.figshare.com/ndownloader/files/5910447)
Supplement: Supplementary file 1 [file 5910447]

year_utc	month_utc	day_utc	hour_utc	latitude	longitude
2011	10	16	0	71.423	-160.792
2011	10	16	12	72.574	-158.819
2011	10	17	0	72.689	-159.595
2011	10	17	12	71.829	-160.121
2011	10	18	0	71.087	-159.771
2011	10	18	12	72.506	-157.295
2011	10	19	0	72.925	-158.569
2011	10	19	12	73.494	-156.967
2011	10	20	0	73.816	-158.24
2011	10	20	12	72.807	-159.387
2011	10	21	0	72.594	-159.658
2011	10	21	12	72.997	-158.304
2011	10	22	0	73.121	-159.199
2011	10	22	12	72.704	-159.343
2011	10	23	0	71.748	-158.236
2011	10	23	12	71.391	-158.254
2011	10	24	0	72.62	-161.146
2011	10	24	12	72.357	-161.037
2011	10	25	0	71.73	-160.427
2011	10	25	12	71.669	-159.942
2011	10	26	0	71.625	-160.456
2011	10	26	12	71.05	-160.969
2011	10	27	0	71.997	-163.482
2011	10	27	12	72.749	-161.118
2011	10	28	0	72.585	-161.379
2011	10	28	12	72.568	-160.764
2011	10	29	0	72.981	-162.523
2011	10	29	12	73.132	-161.406
2011	10	30	0	74.091	-165.164
2011	10	30	12	74.219	-163.921
2011	10	31	0	73.175	-161.176
2011	10	31	12	73.675	-158.807
2011	11	1	0	73.309	-158.311
2011	11	1	12	72.275	-160.814
2011	11	2	0	72.262	-161.442
2011	11	2	12	72.953	-158.569
2011	11	3	0	72.888	-159.069
2011	11	3	12	72.529	-159.569
2011	11	4	0	73.453	-163.693
2011	11	4	12	73.258	-163.692
2011	11	5	0	72.21	-160.564
2011	11	5	12	72.009	-160.56
2011	11	6	0	72.138	-161.681
2011	11	6	12	72.593	-159.301
2011	11	7	0	72.038	-157.92
2011	11	7	12	71.147	-160.288
2011	11	9	0	71.364	-159.886
2011	11	9	12	71.633	-158.251
2011	11	10	0	72.34	-161.864
2011	11	10	12	72.316	-161.226
2011	11	11	0	72.444	-162.588
2011	11	11	12	72.616	-160.949
2011	11	12	0	72.482	-161.059
2011	11	12	12	72.255	-161.418
2011	11	13	0	71.706	-159.526
2011	11	13	12	71.499	-159.758
2011	11	14	0	71.37	-159.864
2011	11	14	12	70.841	-161.47
2011	11	15	12	69.231	-163.428
2011	11	16	0	69.144	-163.655
2011	11	16	12	68.802	-164.257
2011	11	17	0	68.913	-165.108
2011	11	17	12	69.107	-163.958
2011	11	18	0	69.61	-166.307
2011	11	18	12	70.042	-164.031
2011	11	19	0	69.81	-163.628
2011	11	19	12	69.651	-163.725
2011	11	21	0	69.059	-166.634
2011	11	21	12	69.407	-164.728
2011	11	22	12	67.921	-166.787
2011	11	23	0	68.287	-168.502
2011	11	23	12	67.855	-169.592
2011	11	24	0	67.975	-170.431
2011	11	25	12	69.67	-168.694
2011	11	26	0	68.994	-165.905
2011	11	26	12	68.159	-168.99
2011	11	27	0	68.673	-171.574
2011	11	27	12	68.989	-169.658
2011	11	28	0	68.832	-169.366
2011	11	28	12	68.415	-170.823
2011	11	29	0	68.507	-171.654
2011	11	30	12	68.488	-172.894
2011	12	1	0	68.747	-174.597
2011	12	2	0	64.772	-167.504
2011	12	2	12	63.782	-169.831
2011	12	3	0	64.641	-172.281
2011	12	3	12	64.666	-171.982
2011	12	4	0	64.879	-172.806
2011	12	4	12	64.087	-174.755
2011	12	5	0	63.448	-173.329
2011	12	5	12	63.443	-173.153
2011	12	6	0	64.265	-175.474
2011	12	6	12	64.573	-174.422
2011	12	7	0	64.748	-175.118
2011	12	7	12	64.912	-174.439
2011	12	8	0	64.916	-174.635
2011	12	9	12	65.319	-176.968
2011	12	10	0	65.018	-176.162
2011	12	10	12	66.407	-171.107
2011	12	11	0	65.64	-168.425
2011	12	12	12	65.496	-170.126
2011	12	13	0	65.656	-170.817
2011	12	13	12	65.091	-172.633
2011	12	14	0	64.888	-172.073
2011	12	14	12	65.253	-170.764
2011	12	15	0	64.752	-169.205
2011	12	15	12	64.545	-169.77
2011	12	16	0	64.583	-169.959
2011	12	18	12	63.401	-173.653
2011	12	19	0	62.747	-171.967
2011	12	19	12	62.564	-172.405
2011	12	20	0	62.329	-171.844
2011	12	20	12	62.706	-170.907
2011	12	21	0	62.879	-171.345
2011	12	21	12	63.871	-168.659
2011	12	22	0	63.678	-168.097
2011	12	22	12	63.573	-168.41
2011	12	23	0	63.871	-169.223
2011	12	24	12	62.472	-174.41
2011	12	25	0	62.67	-174.848
2011	12	25	12	61.878	-176.786
2011	12	26	0	61.877	-176.724
2011	12	26	12	62.514	-175.288
2011	12	27	0	62.204	-174.477
2011	12	27	12	62.42	-174.04
2011	12	28	0	62.534	-174.229
2011	12	28	12	62.596	-174.168
2011	12	29	0	61.97	-172.608
2011	12	29	12	61.532	-173.672
2011	12	30	0	61.55	-173.612
2011	12	30	12	60.725	-175.426
2011	12	31	0	59.833	-173.617
2011	12	31	12	59.716	-173.932
2012	1	1	0	60.148	-174.623
2012	1	1	12	60.502	-174.064
2012	1	2	0	60.071	-173.131
2012	1	2	12	59.964	-173.447
2012	1	3	0	59.794	-173.015
2012	1	3	12	60.103	-172.582
2012	1	4	0	59.87	-172.025
2012	1	4	12	59.554	-172.718
2012	1	5	0	59.602	-172.662
2012	1	5	12	60	-172.106
2012	1	6	0	59.913	-171.801
2012	1	6	12	59.527	-172.621
2012	1	7	0	59.661	-172.691
2012	1	7	12	60.632	-171.138
2012	1	8	0	59.328	-168.71
2012	1	8	12	59.076	-169.282
2012	1	9	0	59.683	-170.104
2012	1	9	12	58.892	-171.552
2012	1	10	0	59.365	-172.125
2012	1	10	12	59.274	-172.449
2012	1	11	0	58.876	-171.65
2012	1	11	12	58.697	-172.1
2012	1	12	0	58.619	-171.801
2012	1	12	12	59.352	-170.878
2012	1	13	0	59.449	-170.83
2012	1	13	12	60.08	-170.033
2012	1	14	0	60.788	-170.987
2012	1	14	12	61.449	-170.066
2012	1	15	0	60.758	-168.646
2012	1	15	12	60.153	-169.852
2012	1	16	0	60.814	-170.683
2012	1	17	12	59.766	-171.181
2012	1	18	0	59.467	-170.515
2012	1	18	12	59.569	-170.6
2012	1	19	0	60.051	-171.06
2012	1	19	12	59.006	-172.771
2012	1	20	0	58.196	-171.484
2012	1	20	12	58.598	-171.197
2012	1	21	0	58.944	-171.411
2012	1	21	12	58.672	-172
2012	1	22	0	58.931	-172.09
2012	1	22	12	58.656	-172.681
2012	1	23	0	58.212	-171.898
2012	1	23	12	59.048	-171.116
2012	1	24	0	58.615	-170.335
2012	1	24	12	59.648	-169.304
2012	1	25	0	60.026	-169.524
2012	1	25	12	58.75	-171.37
2012	1	26	0	58.297	-170.592
2012	1	26	12	57.643	-171.564
2012	1	27	0	56.647	-170.288
2012	1	27	12	56.408	-170.762
2012	1	28	0	57.004	-171.112
2012	1	29	12	57.018	-171.293
2012	1	30	0	57.762	-171.771
2012	1	30	12	57.412	-172.376
2012	1	31	0	57.659	-172.356
2012	1	31	12	57.561	-172.712
2012	2	1	0	56.74	-171.694
2012	2	1	12	55.903	-172.677
2012	2	2	0	55.73	-172.286
2012	2	2	12	55.438	-172.77
2012	2	3	0	56.631	-173.506
2012	2	3	12	59.015	-171.617
2012	2	4	0	59.174	-171.479
2012	2	4	12	58.562	-172.342
2012	2	5	0	57.588	-171.206
2012	2	5	12	57.924	-171.196
2012	2	6	0	58.389	-171.311
2012	2	6	12	59.433	-170.677
2012	2	7	0	57.872	-169.045
2012	2	7	12	57.129	-169.913
2012	2	8	0	57.802	-170.157
2012	2	8	12	57.853	-170.401
2012	2	9	0	55.266	-168.272
2012	2	9	12	59.515	-165.393
2012	2	10	0	62.245	-167.516
2012	2	10	12	63.108	-167.014
2012	2	11	0	63.47	-167.013
2012	2	12	12	54.752	-167.889
2012	2	13	0	55.42	-168.016
2012	2	13	12	56.082	-167.894
2012	2	14	0	55.915	-167.522
2012	2	14	12	55.281	-168.152
2012	2	15	0	54.856	-167.657
2012	2	15	12	55.577	-167.538
2012	2	16	0	55.866	-167.42
2012	2	16	12	59.561	-165.552
2012	2	17	0	61.022	-166.185
2012	2	17	12	57.207	-168.819
2012	2	18	0	57.541	-168.704
2012	2	18	12	57.612	-168.964
2012	2	19	0	57.485	-168.601
2012	2	19	12	56.001	-169.612
2012	2	20	0	54.671	-168.75
2012	2	20	12	56.419	-168.263
2012	2	21	0	57.095	-168.277
2012	2	21	12	57.445	-168.417
2012	2	22	0	57.019	-167.932
2012	2	22	12	61.341	-166.198
2012	2	23	0	59.533	-164.964
2012	2	23	12	56.032	-166.732
2012	2	24	0	58.131	-167.25
2012	2	24	12	55.891	-168.393
2012	2	25	0	58.463	-169.037
2012	2	25	12	57.912	-169.557
2012	2	26	0	56.675	-168.827
2012	2	26	12	57.52	-168.848
2012	2	27	0	54.42	-167.62
2012	2	27	12	56.64	-167.267
2012	2	28	0	55.994	-166.789
2012	2	28	12	54.099	-167.563
2012	4	16	0	57.587	-168.65
2012	4	16	12	57.27	-168.679
2012	4	17	0	57.423	-168.207
2012	4	18	12	58.423	-168.79
2012	4	19	0	57.846	-169.066
2012	4	19	12	59.237	-170.968
2012	4	20	0	59.019	-170.869
2012	4	20	12	57.407	-169.394
2012	4	21	0	56.722	-169.794
2012	4	21	12	57.935	-171.443
2012	4	22	0	57.173	-171.967
2012	4	22	12	57.786	-172.991
2012	4	23	0	58.322	-172.014
2012	4	23	12	58.366	-172.411
2012	4	24	0	58.764	-171.559
2012	4	24	12	58.705	-171.83
2012	4	25	0	59.078	-170.976
2012	4	25	12	59.97	-172.622
2012	4	27	0	58.335	-171.43
2012	4	27	12	58.283	-171.699
2012	4	29	12	59.117	-173.142
2011	10	16	12	75.026	-152.68
2011	10	17	0	75.508	-154.207
2011	10	17	12	74.402	-155.233
2011	10	18	0	75.056	-157.008
2011	10	18	12	75.661	-155.158
2011	10	19	0	75.27	-155.181
2011	10	19	12	74.992	-154.955
2011	10	20	0	74.94	-155.602
2011	10	20	12	75.121	-154.499
2011	10	21	0	74.179	-153.395
2011	10	21	12	73.505	-153.916
2011	10	22	0	73.964	-155.436
2011	10	22	12	74.047	-154.58
2011	10	23	0	73.176	-153.598
2011	10	23	12	72.666	-153.866
2011	10	24	0	74.339	-157.883
2011	10	24	12	74.011	-157.899
2011	10	25	0	73.289	-157.039
2011	10	25	12	72.771	-157.429
2011	10	26	0	73.128	-158.818
2011	10	26	12	73.498	-157.331
2011	10	27	0	73.423	-157.844
2011	10	27	12	73.234	-157.605
2011	10	28	0	73.058	-157.866
2011	10	28	12	73.495	-156.126
2011	10	29	0	73.841	-157.76
2011	10	29	12	73.53	-157.894
2011	10	30	0	72.637	-156.276
2011	10	30	12	72.674	-155.533
2011	10	31	0	73.134	-157.414
2011	10	31	12	73.501	-155.669
2011	11	1	0	72.915	-154.673
2011	11	1	12	72.199	-155.927
2011	11	2	0	72.289	-156.804
2011	11	2	12	72.282	-156.181
2011	11	3	0	72.139	-156.432
2011	11	3	12	71.071	-158.557
2011	11	4	0	71.624	-160.556
2011	11	4	12	71.583	-160.054
2011	11	5	0	71.217	-159.676
2011	11	5	12	71.137	-159.298
2011	11	6	0	72.291	-163.293
2011	11	6	12	72.866	-160.663
2011	11	7	0	72.598	-160.407
2011	11	7	12	71.559	-163.15
2011	11	8	0	72.379	-166.517
2011	11	8	12	72.502	-165.383
2011	11	9	0	72.073	-164.498
2011	11	9	12	72.236	-163.238
2011	11	10	0	73.199	-167.976
2011	11	10	12	73.832	-163.964
2011	11	11	0	73.576	-163.45
2011	11	11	12	73.465	-163.186
2011	11	12	0	73.327	-163.296
2011	11	12	12	72.954	-164.405
2011	11	13	0	72.59	-163.388
2011	11	13	12	72.618	-162.496
2011	11	14	0	72.964	-165.101
2011	11	14	12	72.703	-165.707
2011	11	15	0	72.208	-163.936
2011	11	15	12	72.553	-161.416
2011	11	16	0	72.758	-163.393
2011	11	16	12	71.872	-167.369
2011	11	17	0	72.3	-170.345
2011	11	17	12	72.863	-166.071
2011	11	18	0	72.295	-163.295
2011	11	18	12	71.947	-164.519
2011	11	19	0	72.052	-165.866
2011	11	19	12	71.819	-166.462
2011	11	20	0	71.388	-164.808
2011	11	20	12	70.727	-167.403
2011	11	21	0	71.226	-170.496
2011	11	21	12	71.317	-169.34
2011	11	22	0	71.006	-168.307
2011	11	22	12	70.249	-171.398
2011	11	23	0	70.148	-171.489
2011	11	23	12	70.173	-170.829
2011	11	24	0	70.156	-171.293
2011	11	24	12	70.382	-169.632
2011	11	25	0	70.165	-169.094
2011	11	25	12	69.959	-169.556
2011	11	26	0	70.242	-171.516
2011	11	26	12	70.378	-170.227
2011	11	27	0	70.27	-170.186
2011	11	27	12	69.745	-172.395
2011	11	28	0	69.663	-172.477
2011	11	28	12	69.843	-171.06
2011	11	29	0	70.017	-172.516
2011	11	29	12	69.727	-173.597
2011	11	30	0	69.361	-172.177
2011	11	30	12	68.631	-175.131
2011	12	1	0	65.564	-164.962
2011	12	1	12	63.493	-169.789
2011	12	2	0	61.906	-166.742
2011	12	2	12	61.498	-167.319
2011	12	3	0	62.285	-169.02
2011	12	3	12	62.278	-168.845
2011	12	4	0	62.769	-170.045
2011	12	4	12	63.053	-169.244
2011	12	5	0	63.448	-170.318
2011	12	5	12	64.072	-168.641
2011	12	6	0	64.515	-169.963
2011	12	6	12	64.697	-169.286
2011	12	7	0	64.608	-169.232
2011	12	7	12	63.83	-171.053
2011	12	8	0	63.742	-170.998
2011	12	8	12	63.851	-170.569
2011	12	9	0	63.717	-170.388
2011	12	9	12	63.424	-170.957
2011	12	10	0	62.81	-169.651
2011	12	10	12	63.417	-168.095
2011	12	11	0	64.589	-171.287
2011	12	11	12	64.426	-171.604
2011	12	12	0	62.604	-167.173
2011	12	12	12	62.693	-166.865
2011	12	13	0	62.948	-167.556
2011	12	13	12	62.163	-169.246
2011	12	14	0	63.484	-172.436
2011	12	14	12	64.456	-169.752
2011	12	15	0	64.579	-170.192
2011	12	15	12	63.704	-172.506
2011	12	16	0	63.938	-173.196
2011	12	16	12	64.165	-172.51
2011	12	17	0	64.031	-172.2
2011	12	17	12	63.367	-173.888
2011	12	18	0	63.666	-174.702
2011	12	18	12	64.911	-171.141
2011	12	19	0	64.714	-170.58
2011	12	19	12	63.112	-174.892
2011	12	20	0	63.429	-175.705
2011	12	20	12	64.282	-173.394
2011	12	21	0	64.034	-172.707
2011	12	21	12	62.789	-175.894
2011	12	22	0	61.889	-173.833
2011	12	22	12	62.369	-172.771
2011	12	23	0	62.778	-173.709
2011	12	23	12	62.441	-174.522
2011	12	24	0	62.536	-174.71
2011	12	24	12	61.911	-176.147
2011	12	25	0	62.241	-176.835
2011	12	25	12	62.668	-175.898
2011	12	26	0	61.887	-174.087
2011	12	26	12	62.391	-173.026
2011	12	27	0	61.883	-171.84
2011	12	27	12	61.225	-173.278
2011	12	28	0	61.229	-173.217
2011	12	28	12	61.659	-172.406
2011	12	29	0	61.242	-171.471
2011	12	29	12	61.375	-171.285
2011	12	30	0	61.755	-171.975
2011	12	30	12	61.155	-173.289
2011	12	31	0	60.321	-171.605
2011	12	31	12	60.806	-170.796
2012	1	1	0	60.962	-170.986
2012	1	1	12	60.655	-171.677
2012	1	2	0	60.482	-171.244
2012	1	2	12	60.51	-171.311
2012	1	3	0	60.338	-170.878
2012	1	4	12	60.164	-170.706
2012	1	5	0	60.211	-170.65
2012	1	5	12	60.035	-171.094
2012	1	6	0	59.64	-170.289
2012	1	6	12	59.532	-170.609
2012	1	7	0	60.191	-171.554
2012	1	7	12	60.674	-170.875
2012	1	8	0	60.231	-169.947
2012	1	9	12	59.253	-170.165
2012	1	10	0	59.49	-170.363
2012	1	10	12	58.811	-171.562
2012	1	11	0	58.197	-170.512
2012	1	11	12	58.528	-170.213
2012	1	12	0	60.112	-172.413
2012	1	12	12	61.022	-171.115
2012	1	13	0	59.798	-168.943
2012	1	13	12	59.793	-169.146
2012	1	14	0	60.538	-170.099
2012	1	14	12	61.158	-169.304
2012	1	15	0	61.563	-169.759
2012	1	15	12	60.501	-171.714
2012	1	16	0	59.527	-170.045
2012	1	16	12	59.618	-170.127
2012	1	17	0	59.297	-169.46
2012	1	17	12	59.119	-169.918
2012	1	18	0	58.591	-169.003
2012	1	18	12	57.49	-170.587
2012	1	19	0	58.83	-172.048
2012	1	19	12	59.592	-171.259
2012	1	20	0	58.981	-170.222
2012	1	20	12	58.293	-171.309
2012	1	21	0	58.136	-170.898
2012	1	21	12	58.66	-170.488
2012	1	22	0	58.821	-170.453
2012	1	22	12	58.631	-170.919
2012	1	23	0	58.164	-170.136
2012	1	23	12	58.177	-170.354
2012	1	24	0	57.573	-169.447
2012	1	24	12	57.697	-169.542
2012	1	25	0	58.113	-169.762
2012	1	25	12	58.357	-169.733
2012	1	26	0	56.266	-167.33
2012	1	26	12	55.874	-167.927
2012	1	27	0	56.607	-168.401
2012	1	27	12	56.353	-168.875
2012	1	28	0	57.598	-169.85
2012	1	28	12	58.592	-169.076
2012	1	29	0	57.967	-168.178
2012	1	29	12	57.353	-169.031
2012	1	30	0	57.328	-168.759
2012	1	30	12	57.483	-168.864
2012	1	31	0	57.598	-168.719
2012	1	31	12	57.625	-168.95
2012	2	1	0	58.284	-169.307
2012	2	1	12	58.052	-169.79
2012	2	2	0	57.211	-168.774
2012	2	2	12	57.381	-168.883
2012	2	3	0	56.169	-167.619
2012	2	3	12	56.804	-167.355
2012	2	4	12	57.593	-170.455
2012	2	5	0	57.903	-170.443
2012	2	5	12	58.391	-170.308
2012	2	7	0	55.856	-168.782
2012	2	7	12	57.422	-167.9
2012	2	8	0	57.612	-167.769
2012	2	8	12	57.144	-168.389
2012	2	9	0	55.894	-167.26
2012	2	9	12	57.556	-166.381
2012	2	10	0	57.052	-165.753
2012	2	10	12	58.17	-165.251
2012	2	11	0	58.574	-165.25
2012	2	11	12	57.171	-166.5
2012	2	12	0	57.215	-166.25
2012	2	12	12	57.26	-166.501
2012	2	13	0	58.099	-166.753
2012	2	13	12	58.16	-167.006
2012	2	14	0	58.035	-166.635
2012	2	14	12	57.479	-167.264
2012	2	15	0	56.898	-166.644
2012	2	16	12	58.411	-165.414
2012	2	17	0	57.14	-164.423
2012	2	17	12	56.705	-164.932
2012	2	18	0	57.29	-164.941
2012	2	19	0	56.141	-166.838
2012	2	19	12	56.998	-166.725
2012	2	20	0	56.271	-166.112
2012	2	20	12	56.602	-166.251
2012	2	21	0	58.41	-166.765
2012	2	22	12	58.487	-166.935
2012	2	23	0	57.753	-166.327
2012	2	23	12	59.672	-165.844
2012	2	24	0	59.597	-165.487
2012	2	25	0	59.028	-168.4
2012	2	25	12	59.164	-168.67
2012	2	26	0	57.587	-167.815
2012	2	26	12	57.688	-168.086
2012	2	27	12	57.179	-165.129
2012	4	16	0	55.773	-168.262
2012	4	16	12	56.032	-168.791
2012	4	17	0	57.026	-167.569
2012	4	17	12	57.24	-168.097
2012	4	18	0	57.012	-168
2012	4	18	12	56.198	-167.527
2012	4	19	0	55.165	-168.179
2012	4	19	12	55.552	-168.83
2012	4	20	0	57.111	-166.981
2012	4	20	12	56.097	-166.256
2012	4	21	0	56.508	-165.531
2012	4	21	12	55.742	-165.055
2012	4	22	0	55.915	-164.579
2012	4	22	12	61.237	-171.603
2012	4	23	0	60.374	-172.502
2012	4	23	12	61.203	-174.149
2012	4	24	0	64.048	-168.546
2012	4	24	12	65.462	-172.318
2012	4	25	0	67.409	-166.088
2012	4	25	12	67.542	-167.234
2012	4	26	0	67.722	-165.879
2012	4	26	12	69.633	-175.649
2012	4	27	0	70.173	-170.918
2012	4	27	12	68.69	-162.935
2012	4	28	0	69.205	-159.203
2012	4	28	12	70.9	-177.847
2012	10	16	0	71.316	-176.518
2012	10	16	12	70.985	-176.294
2012	10	17	12	71.864	-170.469
2012	10	18	0	74.147	-174.368
2012	10	18	12	73.393	-174.892
2012	10	19	0	72.476	-174.164
2012	10	19	12	72.115	-174.062
2012	10	20	0	73.544	-176.958
2012	10	20	12	73.914	-175.604
2012	10	21	0	74.501	-177.499
2012	10	21	12	76.393	-172.018
2012	10	22	0	75.83	-171.287
2012	10	22	12	74.116	-174.68
2012	10	23	0	74.819	-177.074
2012	10	23	12	75.321	-174.968
2012	10	24	0	75.68	-176.859
2012	10	24	12	74.868	-178.374
2012	10	25	0	74.813	-179.013
2012	10	25	12	74.966	-177.777
2012	10	26	0	74.611	-177.539
2012	10	26	12	72.093	177.074
2012	10	27	0	70.82	178.938
2012	10	27	12	73.892	-173.572
2012	10	28	0	73.208	-172.457
2012	10	28	12	73.272	-171.59
2012	10	29	0	72.421	-170.098
2012	10	29	12	71.021	-172.605
2012	10	30	0	70.622	-172.362
2012	10	30	12	68.983	-174.867
2012	10	31	0	69.401	-176.122
2012	10	31	12	70.405	-173.626
2012	11	1	0	71.57	-176.878
2012	11	1	12	72.142	-174.755
2012	11	2	0	71.721	-174.256
2012	11	2	12	71.435	-174.382
2012	11	3	0	71.438	-175.006
2012	11	3	12	71.349	-174.63
2012	11	4	0	70.835	-173.878
2012	11	4	12	70.946	-173
2012	11	5	0	71.899	-176.37
2012	11	5	12	71.731	-176.241
2012	11	6	0	70.52	-173.36
2012	11	6	12	69.663	-174.978
2012	11	7	0	69.596	-175.345
2012	11	7	12	70.663	-171.962
2012	11	8	0	71.082	-173.828
2012	11	8	12	70.93	-173.693
2012	11	9	0	70.654	-173.431
2012	11	9	12	68.649	-178.294
2012	11	10	0	69.475	179.094
2012	11	10	12	71.674	-173.268
2012	11	11	0	70.151	-168.628
2012	11	11	12	70.333	-167.488
2012	11	12	0	70.306	-167.973
2012	11	12	12	68.397	-172.958
2012	11	13	0	67.856	-172.064
2012	11	13	12	67.091	-173.42
2012	11	14	0	65.399	-170.275
2012	11	14	12	66.093	-168.504
2012	11	15	0	65.407	-167.483
2012	11	15	12	65.421	-167.085
2012	11	16	0	65.834	-168.311
2012	11	18	12	64.304	-168.305
2012	11	19	0	65.34	-170.776
2012	11	19	12	65.308	-170.496
2012	11	20	0	65.308	-170.841
2012	11	20	12	66.908	-166.56
2012	11	21	0	65.559	-163.528
2012	11	21	12	64.042	-166.495
2012	11	22	0	63.813	-166.336
2012	11	22	12	63.3	-167.051
2012	11	23	0	63.581	-167.891
2012	11	23	12	63.581	-167.605
2012	11	24	0	63.172	-167.067
2012	11	24	12	62.989	-167.155
2012	11	25	0	62.769	-166.991
2012	11	25	12	62.325	-167.577
2012	11	26	0	62.371	-167.911
2012	11	26	12	62.781	-166.871
2012	11	27	0	63.999	-169.703
2012	11	27	12	64.281	-168.786
2012	11	28	0	63.821	-167.993
2012	11	28	12	62.794	-169.949
2012	11	29	0	62.72	-170.029
2012	11	29	12	63.223	-168.734
2012	11	30	0	63.601	-169.813
2012	11	30	12	63.842	-169.017
2012	12	1	0	63.508	-168.471
2012	12	1	12	63.856	-167.426
2012	12	2	0	63.203	-166.128
2012	12	2	12	62.501	-167.453
2012	12	3	0	62.086	-166.779
2012	12	3	12	61.327	-168.103
2012	12	4	0	61.276	-168.177
2012	12	4	12	61.15	-168.25
2012	12	5	0	61.735	-169.573
2012	12	5	12	61.618	-169.645
2012	12	6	0	61.2	-168.967
2012	12	6	12	60.291	-170.538
2012	12	7	0	59.979	-170.109
2012	12	7	12	59.795	-170.304
2012	12	8	0	59.975	-170.749
2012	12	8	12	60.547	-169.569
2012	12	9	0	60.907	-170.387
2012	12	9	12	60.553	-170.955
2012	12	10	0	59.997	-170.024
2012	12	10	12	59.971	-169.966
2012	12	12	0	61.081	-170.042
2012	12	12	12	61.064	-169.983
2012	12	13	0	60.428	-168.8
2012	12	13	12	59.824	-169.865
2012	12	14	0	59.056	-168.556
2012	12	14	12	58.764	-168.996
2012	12	15	0	58.323	-168.31
2012	12	15	12	57.868	-169
2012	12	16	0	57.957	-169.189
2012	12	16	12	58.937	-167.504
2012	12	17	0	58.215	-166.318
2012	12	17	12	58.156	-166.382
2012	12	18	0	58.025	-166.195
2012	12	18	12	57.894	-166.384
2012	12	19	0	57.53	-165.822
2012	12	19	12	58.026	-165.011
2012	12	20	0	58.36	-165.574
2012	12	20	12	57.469	-167.011
2012	12	21	0	57.9	-167.701
2012	12	21	12	59.045	-165.767
2012	12	22	0	58.727	-165.205
2012	12	22	12	57.716	-166.892
2012	12	23	0	57.45	-166.456
2012	12	23	12	57.421	-166.519
2012	12	24	0	56.907	-165.707
2012	12	24	12	56.799	-165.895
2012	12	25	0	57.674	-167.208
2012	12	25	12	57.814	-167.021
2012	12	26	0	57.957	-167.21
2012	12	26	12	58.773	-165.899
2012	12	27	0	58.016	-164.588
2012	12	27	12	57.775	-165.027
2012	12	28	0	58.164	-165.591
2012	12	28	12	57.452	-166.779
2012	12	29	0	57.127	-166.219
2012	12	29	12	56.961	-166.534
2012	12	30	0	56.969	-166.474
2012	12	30	12	57.227	-166.164
2012	12	31	0	57.572	-166.605
2012	12	31	12	57.42	-166.921
2013	1	1	0	56.676	-165.737
2013	1	1	12	57.623	-164.429
2013	1	2	0	58.134	-165.121
2013	1	2	12	57.085	-166.813
2013	1	3	0	57.456	-167.255
2013	1	3	12	57.65	-167.073
2013	1	4	0	57.18	-166.267
2013	1	4	12	57.468	-165.961
2013	1	5	0	57.255	-165.53
2013	1	5	12	56.762	-166.35
2013	1	6	0	57.079	-166.67
2013	1	6	12	57.641	-165.991
2013	1	7	0	58.037	-166.437
2013	1	7	12	57.572	-167.259
2013	1	8	0	57.548	-167.081
2013	1	8	12	58.53	-165.779
2013	1	9	0	58.925	-166.228
2013	1	9	12	58.324	-167.303
2013	1	10	0	57.71	-166.255
2013	1	10	12	58.959	-164.581
2013	1	11	0	58.711	-164.032
2013	1	11	12	58.093	-165.108
2013	1	12	0	59.993	-167.809
2013	1	12	12	59.833	-168.261
2013	1	13	0	59.202	-167.09
2013	1	13	12	59.525	-166.794
2013	1	14	0	58.435	-164.999
2013	1	14	12	57.408	-166.579
2013	1	15	0	57.802	-166.91
2013	1	15	12	57.309	-167.741
2013	1	16	0	56.414	-166.449
2013	1	16	12	57.801	-164.907
2013	1	17	0	58.857	-166.116
2013	1	17	12	59.13	-165.95
2013	1	18	0	58.897	-165.411
2013	1	18	12	58.53	-166.121
2013	1	19	0	58.283	-165.583
2013	1	20	12	58.142	-166.598
2013	1	21	0	58.984	-167.438
2013	1	21	12	58.507	-168.278
2013	1	22	0	57.417	-166.745
2013	1	22	12	57.312	-167.087
2013	1	23	0	58.443	-168.18
2013	1	23	12	58.768	-168.024
2013	1	24	0	56.397	-165.119
2013	1	24	12	55.906	-165.84
2013	1	25	0	56.944	-166.686
2013	1	25	12	57.07	-166.783
2013	1	26	0	56.416	-165.881
2013	1	26	12	55.91	-166.605
2013	1	27	0	57	-167.455
2013	1	27	12	56.887	-167.805
2013	1	28	0	58.308	-169.032
2013	1	28	12	58.567	-169.009
2013	1	29	0	58.204	-168.364
2013	1	29	12	58.23	-168.595
2013	1	30	0	59.511	-169.7
2013	1	30	12	60.001	-169.43
2013	1	31	0	56.808	-165.912
2013	2	1	0	56.67	-168.253
2013	2	1	12	57.518	-167.737
2013	2	2	0	57.786	-167.722
2013	2	2	12	58.746	-167.083
2013	2	3	0	59.277	-167.32
2013	2	3	12	57.997	-168.807
2013	2	4	0	57.58	-168.17
2013	2	4	12	58.326	-167.785
2013	2	5	0	58.628	-167.775
2013	2	5	12	58.676	-168.016
2013	2	6	0	59.268	-168.258
2013	2	6	12	59.737	-168.125
2013	2	7	0	57.421	-165.869
2013	2	7	12	55.956	-167.238
2013	2	8	0	57.324	-167.983
2013	2	8	12	58.013	-167.729
2013	2	9	0	57.723	-167.226
2013	2	9	12	57.767	-167.473
2013	2	10	0	57.464	-166.972
2013	2	10	12	56.421	-167.971
2013	2	11	0	55.871	-167.346
2013	2	11	12	57.229	-166.722
2013	2	13	0	55.756	-165.229
2013	2	15	12	55.673	-166.632
2013	2	16	0	55.722	-166.39
2013	2	16	12	55.256	-166.899
2013	2	17	0	56.287	-167.158
2013	2	17	12	55.571	-167.795
2013	2	18	0	58.294	-168.933
2013	2	18	12	61.307	-167.445
2013	2	19	0	61.077	-166.957
2013	2	19	12	60.793	-167.47
2013	2	20	0	56.107	-164.733
2013	2	20	12	54.678	-165.622
2013	2	21	0	53.799	-165.012
2013	2	21	12	56.275	-164.278
2013	2	22	0	56.087	-163.919
2013	2	22	12	57.041	-163.811
2013	2	24	0	56.764	-164.116
2013	2	24	12	57.816	-164.01
2013	2	25	0	59.602	-164.405
2013	2	25	12	58.78	-165.051
2013	2	27	0	55.508	-164.866
2013	2	27	12	61.292	-163.264
2013	2	28	0	59.852	-162.412
2013	2	28	12	60.412	-162.561
2013	4	16	0	58.774	-167.106
2013	4	16	12	59.096	-167.76
2013	4	17	0	58.852	-167.664
2013	4	17	12	59.753	-168.944
2013	4	18	0	60.525	-167.724
2013	4	18	12	60.342	-167.876
2013	4	19	0	60.007	-167.903
2013	4	19	12	58.939	-167.054
2013	4	20	0	59.506	-166.08
2013	4	20	12	59.551	-166.481
2013	4	21	0	59.232	-166.506
2013	4	21	12	59.173	-166.781
2013	4	22	0	59.799	-165.68
2013	4	23	12	59.868	-165.124
2013	4	24	0	58.579	-166.397
2013	4	24	12	60.348	-169.044
2013	4	25	0	60.516	-168.44
2013	4	25	12	61.441	-170.211
2013	4	26	0	62.399	-168.231
2013	4	26	12	63.205	-170.126
2013	4	27	0	62.14	-171.646
2013	4	27	12	62.272	-172.289
2013	4	28	0	64.123	-168.182
2013	4	28	12	66.121	-173.7
2013	4	29	0	68.346	-165.467
2013	4	29	12	68.463	-166.733
2013	4	30	0	69.89	-158.249
2013	4	30	12	70.777	-167.14
2011	10	16	0	72.011	-152.841
2011	10	16	12	73.299	-150.617
2011	10	17	0	73.204	-151.144
2011	10	17	12	73.996	-149.295
2011	10	18	0	74.959	-151.695
2011	10	18	12	74.338	-152.095
2011	10	19	0	73.281	-150.993
2011	10	19	12	73.091	-150.642
2011	10	20	0	72.701	-150.664
2011	10	20	12	71.701	-151.561
2011	10	21	0	72.296	-153.083
2011	10	21	12	72.803	-151.603
2011	10	22	0	72.59	-151.873
2011	10	22	12	71.994	-152.267
2011	10	23	0	72.082	-153.035
2011	10	23	12	73.066	-150.553
2011	10	24	0	73.229	-151.57
2011	10	24	12	72.842	-151.711
2011	10	25	0	72.409	-151.477
2011	10	25	12	71.891	-151.866
2011	10	26	0	72.27	-153.255
2011	10	26	12	71.581	-154.019
2011	10	27	0	70.396	-152.406
2011	10	27	12	70.973	-150.792
2011	10	28	0	72.129	-153.803
2011	10	28	12	72.174	-153.063
2011	10	29	0	71.569	-152.322
2011	10	29	12	70.749	-153.456
2011	10	30	0	70.954	-154.464
2011	10	30	12	71.083	-153.595
2011	10	31	0	71.37	-154.851
2011	11	1	12	71.235	-153.614
2011	11	2	0	71.143	-153.992
2011	11	2	12	70.641	-154.618
2011	11	4	12	70.662	-153.492
2011	11	5	0	71.723	-157.114
2011	11	5	12	71.43	-157.361
2011	11	6	0	71.384	-157.856
2011	11	6	12	72.032	-155.101
2011	11	7	0	71.76	-154.845
2011	11	7	12	71.061	-156.463
2011	11	8	0	71.138	-157.33
2011	11	8	12	69.929	-160.321
2011	11	9	0	70.38	-162.186
2011	11	9	12	70.147	-162.3
2011	11	10	12	70.843	-157.402
2011	11	12	0	70.522	-160.109
2011	11	12	12	70.462	-159.718
2011	11	13	0	71.062	-162.576
2011	11	13	12	71.06	-161.933
2011	11	15	0	70.322	-161.624
2011	11	15	12	69.649	-163.478
2011	11	16	0	69.699	-164.205
2011	11	16	12	69.656	-163.807
2011	11	17	0	69.935	-165.408
2011	11	17	12	69.491	-166.508
2011	11	18	0	69.126	-165.732
2011	11	18	12	69.058	-165.456
2011	11	20	0	67.039	-167.995
2011	11	20	12	66.811	-168.215
2011	11	21	0	66.972	-169.059
2011	11	21	12	67.275	-167.778
2011	11	22	0	66.512	-165.995
2011	11	22	12	66.153	-166.587
2011	11	24	0	66.727	-167.981
2011	11	24	12	66.353	-168.695
2011	11	25	0	64.829	-165.033
2011	11	25	12	63.253	-168.244
2011	11	26	0	62.019	-166.08
2011	11	26	12	60.629	-168.29
2011	11	27	0	60.548	-168.374
2011	11	27	12	59.907	-169.208
2011	11	28	0	59.754	-169.166
2011	11	28	12	60.49	-167.749
2011	11	29	0	60.92	-168.705
2011	11	29	12	60.47	-169.285
2011	11	30	0	60.617	-169.74
2011	11	30	12	60.881	-169.07
2011	12	1	0	60.678	-168.899
2011	12	1	12	60.457	-169.102
2011	12	2	0	60.538	-169.429
2011	12	2	12	60.739	-168.881
2011	12	3	0	61.843	-171.206
2011	12	3	12	62.135	-170.407
2011	12	4	0	62.6	-171.607
2011	12	4	12	63.029	-170.431
2011	12	5	0	62.145	-168.631
2011	12	5	12	61.97	-168.829
2011	12	6	0	61.508	-168.027
2011	12	6	12	62.929	-164.725
2011	12	7	0	63.146	-165.421
2011	12	7	12	62.943	-165.742
2011	12	8	0	63.31	-166.812
2011	12	8	12	63.89	-165.133
2011	12	9	0	63.762	-164.952
2011	12	11	12	65.156	-166.044
2011	12	12	0	65.675	-167.985
2011	12	12	12	65.649	-167.927
2011	12	13	0	66.376	-170.867
2011	12	13	12	66.292	-171.058
2011	12	14	0	66.631	-172.623
2011	12	14	12	66.407	-173.438
2011	12	15	0	65.133	-168.755
2011	12	15	12	64.744	-169.945
2011	12	16	0	64.34	-168.76
2011	12	16	12	63.563	-170.948
2011	12	17	0	63.786	-171.637
2011	12	18	12	64.848	-168.33
2011	12	19	0	65.291	-169.893
2011	12	19	12	64.749	-171.706
2011	12	20	0	64.646	-171.394
2011	12	20	12	64.773	-170.957
2011	12	21	0	63.991	-168.521
2011	12	22	12	62.842	-168.335
2011	12	23	0	63.111	-169.023
2011	12	23	12	62.904	-169.586
2011	12	24	0	62.795	-169.274
2011	12	24	12	61.697	-171.961
2011	12	25	0	60.708	-169.775
2011	12	25	12	61.51	-168.089
2011	12	26	0	61.046	-167.027
2011	12	26	12	61.214	-166.716
2011	12	27	0	61.611	-167.529
2011	12	27	12	61.27	-168.342
2011	12	28	0	60.981	-167.657
2011	12	28	12	60.56	-168.595
2011	12	29	0	59.393	-166.285
2011	12	30	0	60.271	-163.415
2011	12	30	12	58.781	-166.229
2011	12	31	0	59.909	-168.169
2011	12	31	12	60.821	-166.485
2012	1	2	0	59.794	-167.807
2012	1	2	12	60.861	-165.875
2012	1	3	0	60.054	-164.192
2012	1	3	12	59.177	-165.884
2012	1	4	0	59.573	-166.452
2012	1	4	12	59.029	-167.52
2012	1	5	0	58.773	-166.964
2012	1	5	12	58.581	-167.408
2012	1	6	0	57.915	-166.228
2012	1	6	12	58.197	-165.923
2012	1	7	0	59.405	-167.743
2012	1	7	12	59.23	-168.189
2012	1	8	0	58.277	-166.511
2012	1	8	12	58.647	-166.083
2012	1	9	0	59.105	-166.655
2012	1	10	12	58.416	-166.126
2012	1	11	0	57.555	-164.702
2012	1	13	12	58.794	-165.084
2012	1	14	0	61.189	-168.787
2012	1	14	12	61.749	-167.992
2012	1	15	0	58.904	-163.073
2012	1	16	12	57.569	-165.691
2012	1	17	0	57.782	-165.774
2012	1	17	12	57.585	-166.232
2012	1	18	0	56.507	-164.691
2012	1	18	12	57.212	-164.026
2012	1	19	0	57.643	-164.362
2012	1	19	12	57.443	-164.823
2012	1	20	0	57.278	-164.41
2012	1	20	12	57.38	-164.498
2012	1	21	0	57.528	-164.462
2012	1	21	12	57.323	-164.926
2012	1	22	0	59.354	-167.266
2012	1	22	12	59.188	-167.732
2012	1	23	0	58.672	-166.824
2012	1	23	12	59.372	-166.167
2012	1	24	0	58.76	-165.136
2012	1	24	12	58.782	-165.355
2012	1	25	0	58.446	-164.7
2012	1	25	12	58.468	-164.921
2012	1	26	0	58.228	-164.393
2012	1	26	12	58.574	-164.24
2012	1	27	0	58.116	-163.464
2012	1	27	12	57.452	-164.438
2012	1	28	0	59.842	-166.913
2012	1	28	12	60.484	-166.389
2012	1	29	0	60.595	-166.241
2012	1	29	12	60.038	-167.218
2012	1	30	0	59.838	-166.697
2012	1	30	12	57.822	-169.176
2012	1	31	0	58.659	-169.781
2012	1	31	12	61.005	-167.388
2012	2	1	0	59.169	-164.995
2012	2	1	12	58.857	-165.603
2012	2	2	0	57.464	-163.961
2012	2	3	12	61.417	-163.667
2012	2	4	0	63.664	-166.155
2012	2	4	12	63.477	-166.767
2012	2	5	0	62.248	-164.881
2012	2	5	12	65.257	-161.246
2012	2	6	0	64.655	-159.987
2012	2	6	12	59.756	-165.978
2012	2	7	0	61.315	-167.22
2012	2	8	12	60.399	-165.327
2012	2	9	0	60.865	-165.447
2012	2	12	12	66.243	-166.689
2012	2	13	0	63.848	-163.566
2012	2	21	12	58.483	-167.467
2012	2	23	0	56.658	-165.514
2012	2	23	12	58.171	-165.156
2012	2	24	0	61.012	-166.174
2012	2	25	12	60.796	-168.607
2012	2	26	0	57.679	-167.002
2012	2	26	12	59.102	-166.773
2012	2	27	0	57.983	-166.045
2012	2	27	12	58.449	-166.192
2012	2	28	0	61.423	-166.964
2012	2	28	12	65.344	-165.613
2012	4	16	0	58.71	-168.325
2012	4	16	12	57.994	-167.978
2012	4	17	0	57.341	-168.257
2012	4	17	12	57.163	-168.41
2012	4	18	0	57.991	-167.312
2012	4	18	12	57.942	-167.589
2012	4	19	0	57.715	-167.491
2012	4	20	12	58.133	-168.444
2012	4	21	0	58.385	-167.844
2012	4	21	12	59.625	-169.618
2012	4	22	0	59.316	-169.642
2012	4	22	12	61.248	-172.541
2012	4	23	0	61.226	-172.189
2012	4	23	12	59.402	-170.086
2012	4	24	0	59.6	-169.483
2012	4	24	12	62.402	-174.005
2012	4	25	0	62.945	-172.651
2012	4	25	12	62.717	-172.672
2012	4	26	0	64.47	-168.816
2012	4	26	12	66.098	-173.211
2012	4	27	0	67.237	-169.355
2012	4	27	12	66.719	-168.373
2012	4	28	0	66.925	-167.141
2011	10	16	12	75.069	-155.943
2011	10	17	0	74.723	-156.095
2011	10	17	12	74.047	-156.496
2011	10	18	0	73.864	-156.896
2011	10	18	12	73.345	-157.045
2011	10	19	0	73.997	-158.819
2011	10	19	12	72.743	-160.218
2011	10	20	0	73.274	-161.74
2011	10	20	12	75.014	-157.637
2011	10	21	0	74.565	-157.408
2011	10	21	12	74.67	-156.429
2011	10	22	0	74.62	-157.073
2011	10	23	12	72.329	-159.004
2011	10	24	0	72.964	-160.896
2011	10	24	12	73.399	-159.287
2011	10	25	0	73.589	-160.427
2011	10	25	12	73.119	-160.817
2011	10	26	0	73.31	-161.956
2011	10	26	12	72.961	-162.094
2011	10	27	0	72.569	-161.856
2011	10	27	12	72.763	-160.743
2011	10	28	0	72.329	-160.379
2011	10	28	12	72.472	-159.389
2011	10	29	0	72.41	-159.898
2011	10	29	12	72.087	-160.031
2011	10	30	0	71.72	-159.789
2011	10	30	12	72.319	-157.671
2011	10	31	0	71.723	-156.801
2011	10	31	12	71.819	-155.932
2011	11	1	0	71.523	-155.811
2011	11	1	12	71.324	-155.689
2011	11	2	0	71.617	-157.067
2011	11	2	12	71.234	-157.443
2011	11	4	0	70.968	-158.068
2011	11	4	12	70.549	-158.567
2011	11	5	0	70.982	-160.314
2011	11	5	12	71.251	-158.936
2011	11	6	0	70.777	-158.181
2011	11	6	12	71.172	-156.426
2011	11	7	0	71.17	-157.045
2011	11	7	12	70.97	-157.038
2011	11	8	0	71.01	-157.78
2011	11	8	12	71.092	-156.896
2011	11	9	0	71.236	-158.011
2011	11	9	12	71.235	-157.376
2011	11	10	0	71.76	-159.989
2011	11	10	12	72.022	-158.227
2011	11	11	0	71.907	-158.463
2011	11	11	12	71.651	-158.824
2011	11	12	0	71.511	-158.934
2011	11	12	12	71.064	-160.043
2011	11	13	0	71.209	-161.276
2011	11	13	12	70.989	-161.508
2011	11	14	0	71.158	-162.864
2011	11	14	12	71.182	-162.095
2011	11	15	0	71.696	-165.199
2011	11	15	12	71.75	-164.178
2011	11	16	0	71.378	-163.03
2011	11	16	12	71.212	-163.132
2011	11	17	0	71.366	-164.608
2011	11	17	12	71.157	-164.958
2011	11	18	0	70.678	-163.308
2011	11	18	12	70.207	-164.781
2011	11	19	0	70.766	-168.003
2011	11	19	12	71.118	-165.475
2011	11	20	0	70.137	-161.196
2011	11	20	12	69.547	-163.166
2011	11	21	0	69.818	-164.885
2011	11	21	12	69.946	-163.728
2011	11	22	0	70.025	-164.695
2011	11	22	12	69.587	-166.162
2011	11	23	0	69.431	-166.002
2011	11	23	12	68.845	-167.967
2011	11	24	0	69.302	-170.431
2011	11	24	12	68.995	-171.269
2011	11	25	0	68.481	-169.607
2011	11	25	12	68.184	-170.318
2011	11	26	0	67.761	-169.154
2011	11	26	12	67.52	-169.615
2011	11	27	0	67.709	-170.699
2011	11	27	12	67.844	-169.783
2011	11	28	0	68.046	-170.99
2011	11	28	12	67.829	-171.448
2011	11	29	0	67.688	-171.279
2011	11	29	12	67.169	-172.86
2011	11	30	0	67.297	-173.689
2011	11	30	12	67.443	-172.769
2011	12	1	0	66.838	-170.848
2011	12	1	12	65.901	-173.676
2011	12	2	0	64.352	-169.504
2011	12	2	12	63.046	-172.455
2011	12	3	0	64.118	-175.28
2011	12	3	12	64.566	-173.856
2011	12	4	0	63.848	-172.182
2011	12	5	12	62.905	-172.778
2011	12	6	0	63.527	-174.475
2011	12	6	12	63.522	-174.297
2011	12	7	0	64.096	-175.993
2011	12	7	12	63.862	-176.439
2011	12	8	0	63.538	-175.759
2011	12	8	12	63.638	-175.33
2011	12	9	0	63.604	-175.399
2011	12	9	12	63.613	-175.218
2011	12	10	0	64.172	-176.911
2011	12	10	12	64.728	-175.105
2011	12	11	0	64.66	-175.048
2011	12	11	12	64.298	-175.99
2011	12	12	0	64.104	-175.557
2011	12	12	12	63.815	-176.249
2011	12	13	0	64.522	-178.44
2011	12	13	12	64.169	-179.38
2011	12	14	0	63.586	-177.822
2011	12	14	12	63.707	-177.387
2011	12	15	0	64.132	-178.702
2011	12	15	12	64.037	-178.892
2011	12	16	0	63.23	-176.707
2011	12	16	12	63.086	-177.021
2011	12	17	0	63.04	-176.96
2011	12	17	12	63.369	-176.025
2011	12	18	0	63.511	-176.463
2011	12	18	12	63.335	-176.902
2011	12	19	0	63.208	-176.591
2011	12	19	12	63.582	-175.529
2011	12	20	0	63.985	-176.717
2011	12	20	12	63.567	-177.905
2011	12	21	0	63.038	-176.469
2011	12	21	12	63.2	-176.032
2011	12	22	0	62.602	-174.47
2011	12	22	12	62.777	-174.033
2011	12	23	0	62.662	-173.721
2011	12	23	12	62.032	-175.284
2011	12	24	0	61.749	-174.597
2011	12	24	12	61.117	-176.035
2011	12	25	0	60.691	-175.098
2011	12	25	12	60.558	-175.411
2011	12	26	0	60.113	-174.475
2011	12	26	12	60.04	-174.663
2011	12	27	0	59.972	-174.477
2011	12	27	12	60.288	-173.916
2011	12	28	0	59.573	-172.48
2011	12	28	12	59.97	-171.794
2011	12	29	0	59.912	-171.608
2011	12	29	12	59.719	-172.048
2011	12	30	0	59.39	-171.363
2011	12	31	12	59.431	-171.183
2012	1	1	0	59.029	-170.374
2012	1	1	12	59.19	-170.19
2012	1	2	0	59.429	-170.507
2012	1	2	12	58.806	-171.698
2012	1	3	0	58.911	-171.765
2012	1	5	12	58.168	-170.107
2012	1	6	0	57.975	-169.677
2012	1	6	12	58.257	-169.372
2012	1	7	0	58.391	-169.442
2012	1	7	12	58.673	-169.138
2012	1	8	0	58.174	-168.21
2012	1	8	12	58.305	-168.157
2012	1	9	0	58.452	-168.23
2012	1	9	12	57.76	-169.427
2012	1	10	0	58.253	-170.001
2012	1	10	12	58.061	-170.45
2012	1	11	0	58.224	-170.525
2012	1	11	12	58.032	-170.975
2012	1	12	0	58.624	-171.676
2012	1	12	12	58.775	-171.628
2012	1	13	0	59.031	-171.83
2012	1	13	12	59.506	-171.283
2012	1	14	0	60.071	-171.986
2012	1	14	12	60.675	-171.191
2012	1	15	0	60.779	-171.146
2012	1	15	12	60.264	-172.226
2012	1	16	0	60.374	-172.182
2012	1	17	12	58.946	-173.43
2012	1	18	0	59.673	-174.264
2012	1	18	12	59.256	-175.099
2012	1	19	0	58.204	-173.435
2012	1	19	12	58.585	-173.146
2012	1	20	0	58.346	-172.609
2012	1	20	12	58.161	-173.071
2012	1	21	0	57.609	-172.16
2012	1	21	12	57.51	-172.5
2012	1	22	0	58.176	-173.09
2012	1	22	12	57.984	-173.556
2012	1	23	0	56.978	-172.148
2012	1	23	12	56.982	-172.366
2012	1	24	0	57.808	-173.084
2012	1	24	12	57.496	-173.678
2012	1	25	12	56.183	-171.245
2012	1	26	0	57.201	-172.092
2012	1	26	12	57.097	-172.439
2012	1	27	0	56.455	-171.538
2012	1	27	12	56.463	-171.762
2012	1	28	0	57.04	-172.112
2012	1	28	12	57.89	-171.463
2012	1	29	0	57.753	-171.065
2012	1	29	12	57.292	-171.793
2012	1	30	0	57.27	-171.521
2012	1	30	12	56.779	-172.251
2012	1	31	0	57.147	-172.356
2012	1	31	12	57.428	-172.337
2012	2	1	0	56.203	-170.944
2012	2	1	12	56.771	-170.677
2012	2	2	0	56.895	-170.536
2012	2	2	12	57.193	-170.52
2012	2	3	0	57.735	-170.756
2012	2	3	12	57.496	-171.242
2012	2	4	0	57.915	-171.354
2012	2	4	12	57.815	-171.717
2012	2	5	0	58.108	-171.706
2012	2	5	12	57.726	-172.32
2012	2	6	0	57.449	-171.811
2012	2	6	12	57.184	-172.302
2012	2	7	0	58.249	-172.92
2012	2	7	12	58.298	-173.163
2012	2	8	0	57.414	-172.157
2012	2	8	12	57.769	-172.151
2012	2	9	0	57.156	-171.397
2012	2	9	12	57.195	-171.643
2012	2	11	0	57.306	-171.388
2012	2	11	12	57.349	-171.637
2012	2	12	0	57.574	-171.513
2012	2	12	12	56.892	-172.264
2012	2	14	12	57.663	-171.902
2012	2	15	0	55.886	-170.532
2012	2	15	12	55.47	-171.038
2012	2	16	0	55.964	-171.045
2012	2	17	12	56.082	-170.819
2012	2	18	0	58.409	-171.829
2012	2	18	12	57.374	-172.715
2012	2	19	0	56.019	-171.726
2012	2	21	0	56	-172.652
2012	2	21	12	57.657	-172.167
2012	2	23	0	58.3	-172.34
2012	2	23	12	60.485	-171.607
2012	2	24	0	61.437	-171.75
2012	2	24	12	59.246	-173.144
2012	2	25	0	61.356	-173.788
2012	2	25	12	62.542	-173.558
2012	2	26	0	58.897	-171.578
2012	2	28	0	57.49	-172.415
2012	4	16	12	57.512	-165.803
2012	4	17	0	56.261	-166.582
2012	4	17	12	54.869	-165.734
2012	4	18	0	54.949	-165.387
2012	4	18	12	54.788	-165.539
2012	4	19	0	57.266	-163.065
2012	4	19	12	57.982	-164.092
2012	4	20	0	57.638	-164.118
2012	4	20	12	57.595	-164.393
2012	4	21	0	56.885	-164.793
2012	4	21	12	58.614	-166.943
2012	4	22	0	57.842	-167.467
2012	4	22	12	58.136	-168.115
2012	4	23	0	57.826	-168.139
2012	4	23	12	58.433	-169.161
2012	4	24	0	57.367	-170.058
2012	4	24	12	57.767	-170.83
2012	4	25	0	59.309	-168.601
2012	4	25	12	59.533	-169.246
2012	4	26	0	58.494	-170.267
2012	4	26	12	58.152	-170.161
2012	4	27	0	58.659	-169.18
2012	4	27	12	58.611	-169.448
2012	4	28	0	58.723	-168.966
2012	4	28	12	58.675	-169.234
2012	4	29	0	58.422	-169.251
2012	4	29	12	57.444	-168.267
2012	4	30	0	57.952	-167.282
2012	4	30	12	57.356	-166.797
2011	10	16	0	74.22	-161.067
2011	10	16	12	75.194	-158.844
2011	10	17	0	74.918	-159.12
2011	10	17	12	73.226	-161.021
2011	10	18	0	72.124	-160.171
2011	10	18	12	74.519	-155.945
2011	10	19	0	75.732	-159.094
2011	10	19	12	75.237	-159.368
2011	10	20	0	75.179	-160.015
2011	10	20	12	75.495	-158.537
2011	10	21	0	74.827	-157.808
2011	10	21	12	74.648	-157.454
2011	10	22	0	74.434	-157.723
2011	10	22	12	73.538	-158.868
2011	10	23	0	73.27	-159.011
2011	10	23	12	72.382	-160.029
2011	10	24	0	73.161	-162.171
2011	10	24	12	73.932	-159.812
2011	10	25	0	73.358	-159.202
2011	10	25	12	72.69	-159.967
2011	10	26	0	73.03	-161.356
2011	10	26	12	72.895	-160.994
2011	10	27	0	72.884	-161.631
2011	10	27	12	73.478	-159.518
2011	10	28	0	73.956	-161.529
2011	10	28	12	73.826	-161.164
2011	10	29	0	73.705	-161.548
2011	10	29	12	73.794	-160.556
2011	10	31	0	73.878	-161.576
2011	10	31	12	73.645	-161.582
2011	11	1	0	73.721	-162.586
2011	11	1	12	74.273	-159.839
2011	11	2	0	74.288	-160.717
2011	11	2	12	74.11	-160.594
2011	11	3	0	73.806	-160.219
2011	11	3	12	73.325	-161.219
2011	11	4	0	72.865	-160.343
2011	11	4	12	72.31	-161.467
2011	11	5	0	71.343	-159.214
2011	11	5	12	70.852	-159.96
2011	11	6	0	71.392	-162.081
2011	11	6	12	71.956	-159.701
2011	11	7	0	71.794	-159.819
2011	11	7	12	71.117	-161.313
2011	11	8	0	70.832	-161.054
2011	11	8	12	71.519	-158.296
2011	11	9	0	71.175	-157.786
2011	11	9	12	71.442	-156.276
2011	11	10	0	72.196	-159.764
2011	11	10	12	72.18	-159.127
2011	11	11	0	71.976	-158.988
2011	11	11	12	71.748	-159.224
2011	11	12	0	72.227	-161.959
2011	11	12	12	71.956	-162.443
2011	11	13	0	71.465	-161.051
2011	11	13	12	71.461	-160.408
2011	11	14	0	71.762	-162.389
2011	11	14	12	71.442	-163.12
2011	11	15	0	71.484	-163.974
2011	11	15	12	71.666	-162.453
2011	11	16	0	71.846	-164.055
2011	11	16	12	71.83	-163.407
2011	11	17	0	71.852	-164.258
2011	11	17	12	71.812	-163.734
2011	11	18	0	71.719	-163.957
2011	11	18	12	71.726	-163.181
2011	11	19	0	71.075	-160.404
2011	11	19	12	70.82	-161.001
2011	11	20	0	71.51	-165.346
2011	11	20	12	71.476	-164.816
2011	11	21	0	71.244	-164.16
2011	11	21	12	70.59	-167.003
2011	11	22	0	69.989	-164.72
2011	11	22	12	68.145	-171.311
2011	11	23	0	67.25	-168.902
2011	11	23	12	66.092	-171.741
2011	11	24	0	65.242	-169.956
2011	11	24	12	65.283	-169.544
2011	11	25	0	65.545	-170.506
2011	11	25	12	65.182	-171.093
2011	11	26	0	64.888	-170.679
2011	11	26	12	64.677	-170.889
2011	11	27	0	63.352	-168.224
2011	11	27	12	62.693	-169.308
2011	11	28	0	62.928	-170.016
2011	11	28	12	63.662	-168.223
2011	11	29	0	64.032	-169.305
2011	11	29	12	63.497	-170.26
2011	11	30	0	61.903	-167.216
2011	11	30	12	60.202	-170.045
2011	12	1	0	60.29	-170.373
2011	12	1	12	61.071	-168.827
2011	12	2	0	61.012	-168.904
2011	12	2	12	60.303	-169.981
2011	12	3	0	60.105	-169.807
2011	12	3	12	60.82	-168.383
2011	12	4	0	62.065	-170.957
2011	12	4	12	63.431	-167.782
2011	12	5	0	63.276	-167.606
2011	12	5	12	63.431	-167.054
2011	12	6	0	64.964	-171.251
2011	12	6	12	64.509	-172.322
2011	12	7	0	64.421	-172.269
2011	12	7	12	63.95	-173.34
2011	12	8	0	63.767	-173.035
2011	12	8	12	63.577	-173.355
2011	12	9	0	63.345	-172.925
2011	12	9	12	63.51	-172.369
2011	12	10	0	63.63	-172.813
2011	12	10	12	64.074	-171.506
2011	12	11	0	64.321	-172.324
2011	12	11	12	63.93	-173.266
2011	12	12	0	63.532	-172.333
2011	12	12	12	63.265	-172.9
2011	12	13	0	63.544	-173.716
2011	12	13	12	63.719	-173.157
2011	12	14	0	63.326	-172.223
2011	12	14	12	63.929	-170.539
2011	12	15	0	63.262	-168.855
2011	12	15	12	61.946	-171.919
2011	12	16	0	62.599	-173.483
2011	12	16	12	63.059	-172.298
2011	12	17	0	63.261	-172.862
2011	12	17	12	63.069	-173.301
2011	12	18	0	63.513	-174.489
2011	12	18	12	63.427	-174.678
2011	12	19	0	62.493	-172.367
2011	12	19	12	62.027	-173.43
2011	12	20	0	61.657	-172.619
2011	12	20	12	62.071	-171.682
2011	12	21	0	62.153	-171.87
2011	12	21	12	61.624	-173.058
2011	12	22	0	61.6	-172.996
2011	12	22	12	61.403	-173.434
2011	12	23	0	61.086	-172.747
2011	12	23	12	60.945	-173.06
2011	12	24	0	60.365	-171.873
2011	12	24	12	61.037	-170.562
2011	12	25	0	61.267	-170.999
2011	12	25	12	61.494	-170.563
2011	12	26	0	61.432	-170.376
2011	12	26	12	61.008	-171.314
2011	12	27	0	60.57	-170.378
2011	12	27	12	60.376	-170.817
2011	12	28	0	60.183	-170.381
2011	12	28	12	60.186	-170.445
2011	12	29	0	59.298	-168.759
2011	12	29	12	59.376	-168.699
2011	12	30	0	59.672	-169.138
2011	12	30	12	59.961	-168.703
2011	12	31	0	60.319	-169.268
2011	12	31	12	60.135	-169.709
2012	1	1	0	60.161	-169.649
2012	1	2	0	58.996	-169.532
2012	1	2	12	58.947	-169.724
2012	1	3	0	58.981	-169.666
2012	1	3	12	59.386	-169.108
2012	1	4	0	59.279	-168.801
2012	1	4	12	58.701	-169.869
2012	1	5	0	59.058	-170.313
2012	1	5	12	59.477	-169.757
2012	1	6	0	59.304	-169.327
2012	1	6	12	59.273	-169.522
2012	1	7	0	59.784	-170.217
2012	1	7	12	59.686	-170.538
2012	1	8	0	59.751	-170.484
2012	1	8	12	59.731	-170.681
2012	1	9	0	58.94	-169.254
2012	1	9	12	58.998	-169.327
2012	1	10	0	58.746	-168.776
2012	1	10	12	58.473	-169.35
2012	1	11	0	60.012	-171.55
2012	1	11	12	59.693	-172.25
2012	1	12	0	59.463	-171.701
2012	1	12	12	60.398	-170.403
2012	1	13	0	60.109	-169.73
2012	1	13	12	60.03	-170.058
2012	1	14	0	60.133	-170.012
2012	1	14	12	60.057	-170.341
2012	1	15	0	58.991	-168.546
2012	1	15	12	58.813	-169.002
2012	1	16	0	59.195	-169.333
2012	1	17	12	58.317	-170.831
2012	1	18	0	57.963	-170.165
2012	1	18	12	58.061	-170.25
2012	1	19	0	59.43	-171.835
2012	1	19	12	59.805	-171.547
2012	1	20	0	59.312	-170.634
2012	1	20	12	57.643	-172.971
2012	1	21	0	55.551	-170.436
2012	1	21	12	56.132	-170.025
2012	1	22	0	57.428	-171.24
2012	1	22	12	57.544	-171.331
2012	1	23	0	57.494	-171.048
2012	1	23	12	57.835	-170.891
2012	1	24	0	57.112	-169.86
2012	1	24	12	56.16	-171.079
2012	1	25	0	55.2	-169.924
2012	1	25	12	55.716	-169.645
2012	1	26	0	56.551	-170.242
2012	1	26	12	56.558	-170.464
2012	1	27	0	56.64	-170.313
2012	1	27	12	56.904	-170.287
2012	1	28	0	57.496	-170.637
2012	1	28	12	57.763	-170.613
2012	1	29	0	57.11	-169.715
2012	1	29	12	56.999	-170.068
2012	1	30	0	56.57	-169.422
2012	1	30	12	56.029	-170.151
2012	1	31	0	55.994	-169.881
2012	2	1	12	57.002	-169.452
2012	2	2	0	55.655	-168.061
2012	2	2	12	55.666	-168.295
2012	2	3	0	55.482	-167.906
2012	2	3	12	56.279	-167.517
2012	2	4	0	57.772	-168.504
2012	2	4	12	56.607	-169.742
2012	2	5	0	55.961	-168.981
2012	2	5	12	57.716	-167.846
2012	2	6	0	55.629	-165.961
2012	2	6	12	55.988	-165.953
2012	2	7	0	56.835	-166.32
2012	2	7	12	56.868	-166.563
2012	2	8	0	57.224	-166.557
2012	2	8	12	55.12	-168.301
2012	2	9	0	55.499	-168.297
2012	2	9	12	58.837	-166.168
2012	2	10	0	57.893	-165.166
2012	2	10	12	56.124	-166.664
2012	2	11	0	56.343	-166.538
2012	2	11	12	54.957	-167.662
2012	2	12	0	54.317	-167.038
2012	2	12	12	55.195	-166.789
2012	2	13	0	57.492	-167.916
2012	2	13	12	57.743	-168.044
2012	2	14	0	56.151	-166.797
2012	2	14	12	55.513	-167.427
2012	2	15	0	55.085	-166.932
2012	2	15	12	55.812	-166.813
2012	2	16	0	57.248	-167.32
2012	2	16	12	59.632	-166.202
2012	2	17	0	58.285	-165.085
2012	2	17	12	56.737	-166.219
2012	2	18	0	57.315	-166.229
2012	2	18	12	57.131	-166.614
2012	2	19	0	55.925	-165.75
2012	2	19	12	58.787	-164.637
2012	2	20	0	59.65	-164.775
2012	2	20	12	58.281	-165.788
2012	2	21	0	57.896	-165.302
2012	2	21	12	56.55	-166.192
2012	2	22	12	55.449	-164.723
2012	2	23	0	58.118	-165.489
2012	2	23	12	59.116	-165.381
2012	2	24	0	60.764	-165.774
2012	2	25	12	61.407	-167.832
2012	2	26	0	61.1	-167.352
2012	2	26	12	60.985	-167.748
2012	2	28	0	61.194	-167.065
2012	2	28	12	61.063	-167.463
2012	4	16	0	56.837	-164.674
2012	4	16	12	57.329	-165.453
2012	4	17	0	55.714	-166.607
2012	4	18	12	54.282	-165.564
2012	4	19	0	54.936	-164.716
2012	4	19	12	54.638	-164.742
2012	4	20	0	54.567	-164.518
2012	4	20	12	55.366	-165.543
2012	4	21	0	54.759	-165.818
2012	4	21	12	54.339	-165.718
2012	4	22	0	53.586	-166.117
2012	4	22	12	55.796	-168.515
2012	4	23	0	56.776	-167.163
2012	4	23	12	56.738	-167.436
2012	4	24	0	56.212	-167.708
2012	4	24	12	55.373	-167.104
2012	4	25	0	56.336	-165.75
2012	4	25	12	57.25	-167.146
2012	4	26	0	57.277	-166.791
2012	4	26	12	56.523	-166.185
2012	4	27	0	56.354	-166.08
2012	4	27	12	56.425	-166.473
2012	4	28	0	55.527	-167.241
2012	4	28	12	54.406	-166.258
2012	4	30	0	55.074	-166.682
2012	4	30	12	54.636	-166.447
2012	10	16	0	70.715	-149.385
2012	10	16	12	72.58	-146.536
2012	10	17	0	73.109	-147.936
2012	10	17	12	72.23	-148.586
2012	10	18	0	71.906	-148.736
2012	10	18	12	70.494	-150.009
2012	10	19	0	70.575	-150.657
2012	10	19	12	70.713	-149.93
2012	10	20	0	70.598	-150.326
2012	10	20	12	70.639	-149.722
2012	10	21	0	70.528	-150.117
2012	10	23	12	71.556	-148.957
2012	10	24	0	72.04	-150.473
2012	10	24	12	71.038	-151.738
2012	10	25	0	70.865	-152.003
2012	10	25	12	72.278	-148.641
2012	10	26	0	73.075	-151.154
2012	10	26	12	72.586	-151.666
2012	10	27	0	71.354	-149.552
2012	10	30	0	70.875	-153.355
2012	10	30	12	71.268	-151.862
2012	11	1	12	71.257	-149.751
2012	11	2	0	71.449	-150.877
2012	11	2	12	71.082	-151.253
2012	11	3	0	71.045	-151.752
2012	11	3	12	71.054	-151.126
2012	11	4	0	71.061	-151.749
2012	11	4	12	71.368	-150.246
2012	11	5	0	71.16	-150.242
2012	11	5	12	71.165	-149.612
2012	11	6	0	71.401	-150.981
2012	11	6	12	71.733	-149.225
2012	11	7	0	71.433	-148.842
2012	11	7	12	70.497	-151.209
2012	11	8	0	72.751	-160.199
2012	11	8	12	73.683	-154.565
2012	11	9	0	72.076	-147.429
2012	11	11	12	70.777	-161.609
2012	11	12	0	70.224	-160.218
2012	11	14	0	69.417	-162.893
2012	11	14	12	69.225	-162.997
2012	11	15	0	69.363	-163.975
2012	11	15	12	68.039	-167.577
2012	11	16	0	67.739	-167.178
2012	11	17	0	68.756	-166.128
2012	11	17	12	68.579	-166.227
2012	11	18	0	68.54	-166.575
2012	11	18	12	68.776	-165.297
2012	11	20	0	68.358	-165.958
2012	11	21	0	70.898	-167.144
2012	11	21	12	70.028	-171.236
2012	11	22	0	68.894	-166.703
2012	11	22	12	66.849	-173.292
2012	11	23	0	67.586	-176.006
2012	11	23	12	68.608	-171.845
2012	11	24	0	69.104	-174.432
2012	11	24	12	69.031	-174.27
2012	11	25	0	67.491	-168.607
2012	11	25	12	68.654	-163.694
2012	11	26	0	69.646	-169.027
2012	11	26	12	70.161	-165.363
2012	11	27	12	67.943	-173.527
2012	11	28	0	67.959	-173.983
2012	11	28	12	68.201	-172.565
2012	11	29	0	68.041	-172.27
2012	11	29	12	68.462	-169.976
2012	11	30	0	68.151	-168.93
2012	11	30	12	68.424	-167.259
2012	12	1	0	69	-170.71
2012	12	1	12	67.709	-176.661
2012	12	2	0	65.743	-169.741
2012	12	2	12	66.533	-166.82
2012	12	3	0	66.045	-165.396
2012	12	3	12	66.094	-164.971
2012	12	4	0	66.5	-166.669
2012	12	4	12	66.742	-165.493
2012	12	5	0	67.099	-167.19
2012	12	5	12	65.954	-171.261
2012	12	6	0	65.539	-170.083
2012	12	6	12	65.139	-171.155
2012	12	7	0	64.816	-170.35
2012	12	7	12	64.258	-171.795
2012	12	8	0	63.723	-170.49
2012	12	8	12	63.252	-171.56
2012	12	9	0	62.822	-170.629
2012	12	9	12	62.74	-170.697
2012	12	10	0	63.269	-172.14
2012	12	10	12	64.163	-169.583
2012	12	11	0	64.315	-170.15
2012	12	11	12	63.395	-172.591
2012	12	12	0	63.286	-172.408
2012	12	12	12	62.78	-173.599
2012	12	13	0	63.164	-174.664
2012	12	13	12	64.191	-171.731
2012	12	14	0	63.705	-170.422
2012	12	14	12	62.499	-173.486
2012	12	15	0	62.293	-173.051
2012	12	15	12	61.921	-173.865
2012	12	16	0	62.455	-175.179
2012	12	16	12	63.054	-173.618
2012	12	17	0	62.772	-172.932
2012	12	17	12	62.431	-173.746
2012	12	18	0	61.813	-172.31
2012	12	18	12	61.04	-173.998
2012	12	19	0	62.066	-176.31
2012	12	19	12	62.552	-175.124
2012	12	20	0	63.483	-177.561
2012	12	20	12	64.483	-174.625
2012	12	21	0	64.14	-173.564
2012	12	21	12	62.409	-178.25
2012	12	22	0	61.973	-177.188
2012	12	22	12	62.53	-175.877
2012	12	23	0	63.108	-177.314
2012	12	23	12	63.003	-177.627
2012	12	24	0	62.754	-176.941
2012	12	24	12	62.497	-177.628
2012	12	25	0	62.444	-177.442
2012	12	25	12	63.186	-175.631
2012	12	26	0	62.851	-174.695
2012	12	26	12	63.003	-174.383
2012	12	27	0	63.395	-175.322
2012	12	27	12	63.358	-175.511
2012	12	28	0	63.467	-175.7
2012	12	28	12	63.482	-175.764
2012	12	29	0	62.872	-174.079
2012	12	29	12	61.657	-177.018
2012	12	30	0	61.793	-177.208
2012	12	30	12	62.988	-174.524
2013	1	1	0	63.029	-172.348
2013	1	1	12	61.407	-176.163
2013	1	2	0	61.623	-176.48
2013	1	2	12	61.175	-177.547
2013	1	3	0	61.218	-177.489
2013	1	3	12	61.381	-177.307
2013	1	4	0	61.43	-177.253
2013	1	4	12	61.225	-177.824
2013	1	5	0	61.089	-177.393
2013	1	5	12	62.174	-175.339
2013	1	6	0	61.879	-174.534
2013	1	6	12	61.44	-175.605
2013	1	7	0	60.855	-174.302
2013	1	7	12	60.71	-174.748
2013	1	8	0	61.314	-175.695
2013	1	8	12	61.113	-176.268
2013	1	9	0	61.388	-176.591
2013	1	9	12	62.336	-174.916
2013	1	10	0	62.539	-175.115
2013	1	10	12	63.193	-173.941
2013	1	11	0	63.338	-174.016
2013	1	11	12	62.161	-176.717
2013	1	12	0	61.534	-175.294
2013	1	12	12	61.131	-176.247
2013	1	13	0	62.31	-178.2
2013	1	13	12	61.938	-179.153
2013	1	14	0	60.547	-176.484
2013	1	14	12	61.227	-175.564
2013	1	15	0	61.048	-175.02
2013	1	15	12	60.689	-175.852
2013	1	16	0	59.26	-173.435
2013	1	16	12	60.111	-172.393
2013	1	17	0	60.482	-172.727
2013	1	17	12	59.842	-173.936
2013	1	18	0	59.546	-173.271
2013	1	18	12	59.651	-173.357
2013	1	19	0	59.881	-173.444
2013	1	19	12	61.236	-171.657
2013	1	20	0	61.384	-171.621
2013	1	20	12	59.724	-174.334
2013	1	21	0	59.421	-173.674
2013	1	21	12	60.444	-172.515
2013	1	22	0	60.869	-172.856
2013	1	22	12	59.737	-174.698
2013	1	23	0	59.721	-174.417
2013	1	23	12	60.501	-173.636
2013	1	24	0	59.74	-172.356
2013	1	24	12	60.162	-172.076
2013	1	25	0	59.668	-171.173
2013	1	25	12	59.196	-172.02
2013	1	26	0	58.867	-171.368
2013	1	26	12	59.433	-170.967
2013	1	27	0	59	-170.192
2013	1	27	12	58.133	-171.417
2013	1	28	0	58.354	-171.394
2013	1	28	12	58.152	-171.871
2013	1	29	0	57.653	-171.099
2013	1	29	12	58.176	-170.828
2013	1	30	0	58.539	-170.933
2013	1	30	12	61.045	-168.414
2013	1	31	12	57.334	-170.628
2013	2	1	0	57.866	-170.861
2013	2	1	12	59.063	-169.97
2013	2	2	0	58.702	-169.33
2013	2	2	12	58.751	-169.566
2013	2	3	0	59.165	-169.678
2013	2	3	12	58.287	-170.79
2013	2	4	0	57.741	-170.029
2013	2	4	12	57.784	-170.268
2013	2	5	0	58.388	-170.508
2013	2	5	12	59.144	-170.126
2013	2	6	0	62.354	-172.995
2013	2	6	12	63.963	-171.487
2013	2	7	0	60.677	-167.606
2013	2	7	12	60.893	-167.725
2013	2	8	0	60.701	-167.221
2013	2	8	12	59.205	-168.842
2013	2	9	0	60.019	-169.213
2013	2	9	12	61.783	-167.961
2013	2	10	0	60.326	-166.335
2013	2	10	12	56.735	-169.334
2013	2	11	0	57.152	-169.334
2013	2	11	12	57.573	-169.335
2013	2	12	0	60.872	-171.461
2013	2	13	0	61.549	-167.842
2013	2	13	12	58.966	-170.096
2013	2	14	0	61.326	-171.476
2013	2	14	12	61.279	-171.857
2013	2	16	0	56.927	-169.378
2013	2	16	12	56.516	-169.886
2013	2	17	0	56.84	-169.771
2013	2	17	12	57.375	-169.781
2013	2	18	0	60.581	-171.292
2013	2	18	12	61.509	-171.053
2013	2	19	0	58.886	-169.19
2013	2	19	12	61.835	-167.828
2013	2	20	0	58.645	-165.716
2013	2	21	12	61.026	-165.761
2013	2	22	0	62.626	-166.278
2013	2	22	12	63.686	-166.044
2013	2	23	0	60.369	-163.937
2013	2	23	12	57.57	-165.455
2013	2	24	0	58.41	-165.474
2013	2	24	12	56.115	-166.619
2013	2	25	0	57.032	-166.639
2013	2	25	12	60.536	-165.659
2013	2	26	0	57.33	-164.18
2013	2	26	12	57.033	-164.577
2013	2	27	0	55.55	-163.849
2013	2	28	12	58.697	-164.67
2013	4	16	0	58.178	-164.339
2013	4	16	12	57.731	-164.243
2013	4	17	0	57.747	-163.897
2013	4	17	12	56.642	-163.174
2013	4	20	12	56.992	-165.085
2013	4	21	0	56.032	-165.735
2013	4	22	12	57.191	-166.183
2013	4	23	0	56.057	-167.081
2013	4	23	12	55.298	-166.604
2013	4	24	0	56.074	-165.501
2013	4	24	12	56.72	-166.523
2013	4	25	0	56.424	-166.544
2013	4	25	12	56.499	-166.94
2013	4	26	0	57.066	-165.96
2013	4	26	12	56.182	-165.23
2013	4	27	0	56.333	-164.749
2013	4	27	12	56.509	-165.268
2013	4	28	0	54.932	-166.786
2012	10	16	0	73.085	-154.786
2012	10	16	12	74.391	-152.437
2012	10	17	0	74.437	-153.214
2012	10	18	12	72.72	-154.414
2012	10	19	0	72.267	-154.437
2012	10	19	12	73.553	-151.959
2012	10	20	0	73.983	-153.356
2012	10	20	12	73.491	-153.502
2012	10	21	0	74.365	-155.772
2012	10	21	12	74.495	-154.791
2012	10	22	0	74.144	-154.81
2012	10	22	12	76.416	-148.578
2012	10	23	0	76.696	-150.345
2012	10	23	12	76.974	-148.486
2012	10	24	0	77.724	-152.38
2012	10	24	12	76.665	-155.397
2012	10	25	0	75.099	-151.411
2012	10	25	12	74.895	-151.175
2012	10	26	0	75.394	-153.437
2012	10	26	12	75.442	-152.45
2012	10	27	0	74.595	-150.71
2012	10	27	12	73.086	-153.846
2012	10	28	0	71.44	-150.981
2012	10	28	12	71.64	-149.989
2012	10	29	0	72.12	-151.622
2012	10	29	12	71.356	-152.63
2012	10	30	0	71.835	-154.261
2012	10	30	12	73.324	-149.894
2012	10	31	0	72.753	-149.025
2012	10	31	12	72.153	-149.904
2012	11	1	0	72.099	-150.407
2012	11	1	12	72.562	-148.534
2012	11	2	0	72.413	-148.786
2012	11	2	12	72.174	-148.786
2012	11	3	0	71.938	-148.786
2012	11	4	12	72.344	-147.404
2012	11	5	0	72.327	-148.025
2012	11	5	12	72.034	-148.271
2012	11	6	0	70.808	-145.392
2012	11	6	12	70.296	-146.138
2012	11	7	0	71.524	-150.13
2012	11	8	12	70.791	-148.727
2012	11	9	0	70.412	-148.216
2012	11	9	12	71.705	-143.58
2012	11	10	0	72.415	-146.941
2012	11	10	12	72.395	-146.303
2012	11	11	0	71.776	-144.538
2012	11	11	12	70.509	-148.273
2012	11	12	0	73.434	-161.255
2012	11	12	0	72.882	-149.1
2012	11	12	12	74.121	-155.865
2012	11	13	12	72.168	-151.831
2012	11	14	0	72.546	-154.435
2012	11	15	12	69.78	-159.744
2012	11	16	0	71.44	-166.72
2012	11	16	12	70.949	-168.195
2012	11	17	0	69.668	-163.92
2012	11	17	12	69.984	-162.27
2012	11	18	0	70.446	-164.617
2012	11	18	12	69.755	-166.714
2012	11	19	0	69.104	-164.937
2012	11	19	12	68.891	-165.16
2012	11	20	0	69.558	-168.004
2012	11	20	12	70.125	-165.223
2012	11	21	0	70.755	-168.69
2012	11	21	12	70.662	-168.532
2012	11	22	0	70.188	-166.873
2012	11	22	12	70.288	-165.839
2012	11	23	0	71.348	-172.302
2012	11	23	12	70.4	-177.015
2012	11	24	0	69.293	-172.479
2012	11	24	12	70.467	-166.442
2012	11	25	0	70.012	-164.654
2012	11	25	12	70.251	-162.865
2012	11	26	0	70.321	-163.827
2012	11	26	12	69.92	-165.413
2012	11	27	0	70.675	-170.37
2012	11	27	12	69.611	-175.826
2012	11	28	0	69.771	-177.157
2012	11	28	12	70.724	-170.74
2012	11	29	0	71.274	-176.069
2012	11	29	12	71.558	-172.025
2012	11	30	0	70.959	-166.605
2012	11	30	12	69.706	-174.807
2012	12	1	0	68.873	-170.885
2012	12	1	12	68.3	-173.087
2012	12	2	0	67.875	-171.666
2012	12	2	12	68.044	-170.619
2012	12	3	0	68.213	-171.694
2012	12	3	12	68.059	-172.019
2012	12	4	0	66.818	-167.469
2012	12	4	12	66.719	-167.542
2012	12	5	0	67.525	-170.864
2012	12	5	12	67.278	-171.561
2012	12	6	0	67.067	-171.008
2012	12	6	12	66.847	-171.579
2012	12	7	0	65.978	-168.776
2012	12	7	12	64.55	-172.845
2012	12	8	0	64.823	-173.789
2012	12	8	12	65.166	-172.609
2012	12	9	0	64.204	-170.056
2012	12	9	12	63.734	-171.126
2012	12	10	0	64.544	-173.443
2012	12	10	12	63.913	-175.011
2012	12	11	0	64.122	-175.703
2012	12	11	12	64.97	-173.145
2012	12	12	0	64.523	-171.962
2012	12	12	12	63.529	-174.528
2012	12	13	0	63.415	-174.344
2012	12	13	12	63.785	-173.285
2012	12	14	0	63.96	-173.85
2012	12	14	12	64.129	-173.29
2012	12	15	0	63.613	-171.98
2012	12	15	12	62.329	-175.046
2012	12	16	0	62.757	-176.112
2012	12	16	12	64.833	-170.428
2012	12	17	0	65.15	-171.491
2012	12	17	12	64.066	-174.679
2012	12	18	0	63.376	-172.868
2012	12	18	12	62.578	-174.806
2012	12	19	0	62.433	-174.494
2012	12	19	12	62.712	-173.808
2012	12	20	0	63.757	-176.495
2012	12	20	12	63.774	-176.433
2012	12	21	0	63.703	-176.246
2012	12	21	12	64.726	-173.31
2012	12	22	0	65.298	-175.125
2012	12	22	12	65.32	-175.065
2012	12	23	0	64.679	-173.003
[truncated: 8,747 more rows]
